# Supplementary material for: Ultraviolet light-emitting diode-assisted highly sensitive room temperature NO2 gas sensors based on low-temperature solution-processed ZnO/TiO2 nanorods decorated with plasmonic Au nanoparticles
Source: Royal Society of Chemistry journal article supplement (doi:10.1039/d1nr01001h), 2021-01-01
Supplement: d1nr01001h7.pdf [file d1nr01001h7.pdf]

## Supporting Information (SI)

### ZnO/TiO<sub>2</sub> (10 nm)/Au (Annealed)

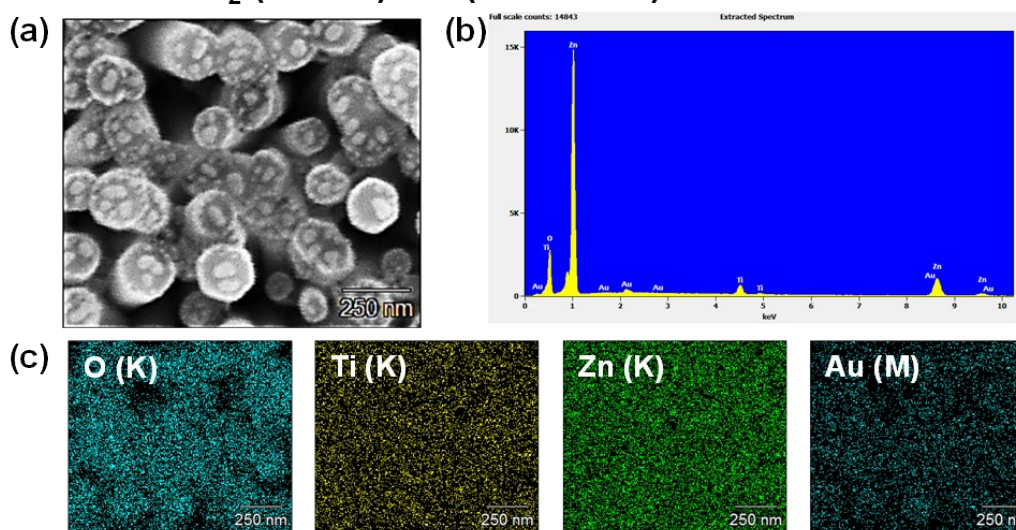

### ZnO/TiO<sub>2</sub> (25 nm)/Au (Annealed)

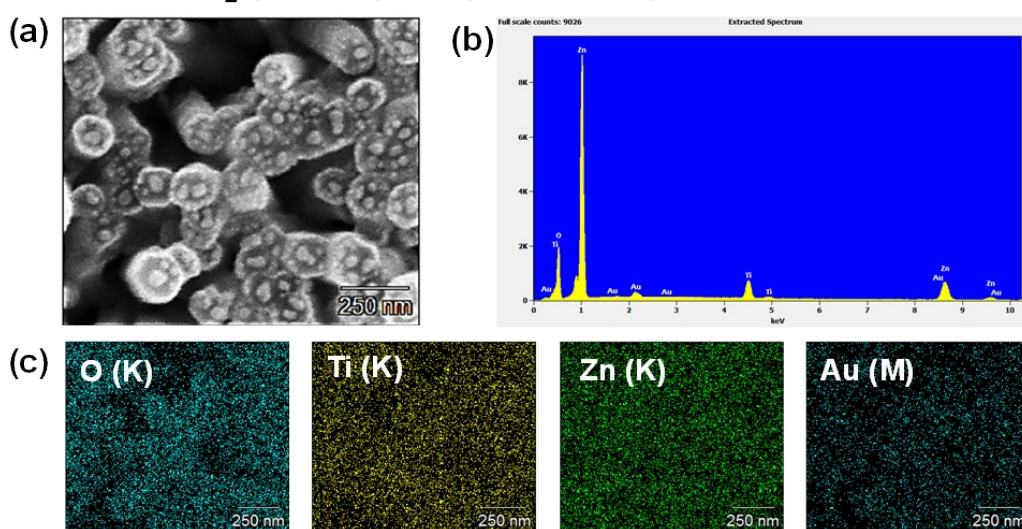

**Fig. S1** EDS results of ZnO/TiO<sub>2</sub> core-shell NRs with a different shell thickness decorated with the plasmonic Au NPs. (a), (d) SEM images, and (b), (e) EDS. (c) and (f) EDS element mapping data of O, Ti, Zn, and Au.

| Element | ZnO/TiO <sub>2</sub> (10 nm)/Au |            | ZnO/TiO <sub>2</sub> (25 nm)/Au |            |
|---------|---------------------------------|------------|---------------------------------|------------|
|         | Weight (%)                      | Atomic (%) | Weight (%)                      | Atomic (%) |
| O K     | 17.68                           | 46.82      | 18.84                           | 48.34      |
| Ti k    | 5.70                            | 5.04       | 10.19                           | 8.73       |
| Zn L    | 73.12                           | 47.39      | 67.08                           | 42.12      |
| Au M    | 3.50                            | 0.75       | 3.09                            | 0.81       |
| Totals  | 100                             | 100        | 100                             | 100        |

**Table S1.** Weight and atomic values of a ZnO/TiO<sub>2</sub> core-shell NRs with the different shell thickness decorated with the plasmonic Au NPs.

Fig. S1 and Table S1. show the SEM images, EDS spectrum, and EDS elemental mapping data. Through the results of EDS analysis, we can find each samples consist of Zn, Ti, O, and Au. Furthermore, weight and atomic % of Ti and O were increased with the TiO<sub>2</sub> thickness. This result shows the thickness of the TiO<sub>2</sub> layer is controlled according to the synthesis time.

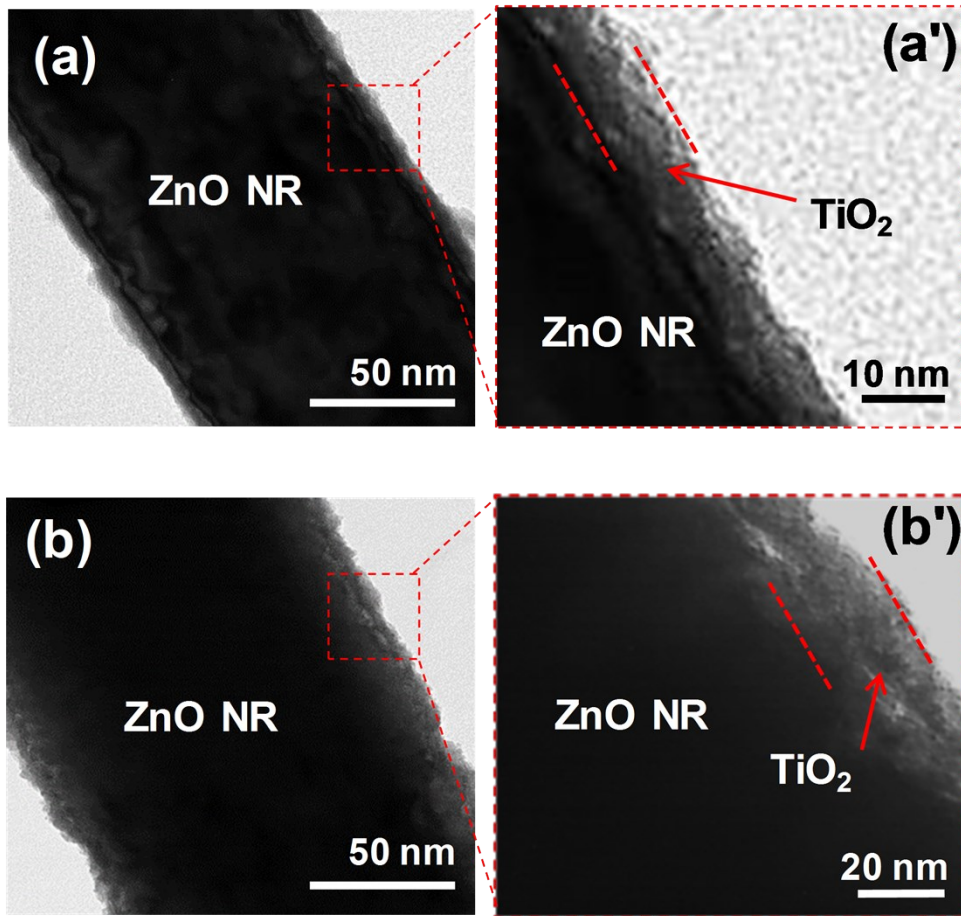

**Fig. S2** (a), (b) Low and (a'), (b') high-magnification of TEM images of ZnO/TiO<sub>2</sub> core-shell nanorods with the 10 nm and 25 nm-thick TiO<sub>2</sub> shell layer, respectively.<sup>1-3</sup>

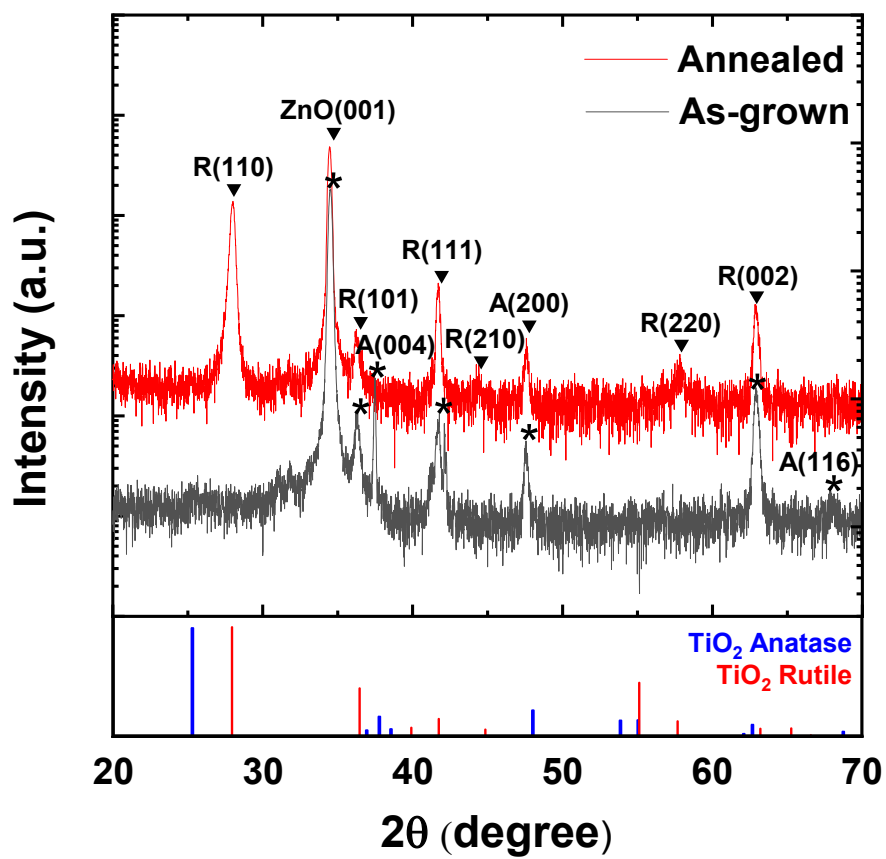

**Fig. S3** X-ray diffraction results of ZnO/TiO<sub>2</sub> core-shell NRs before and after annealing process at 500 °C with the standard cards of anatase and rutile TiO<sub>2</sub>.

As shown this Fig S3., we can confirm the TiO<sub>2</sub> shell layer was crystallized from amorphous (anatase) to rutile.

**(a) As-grown**

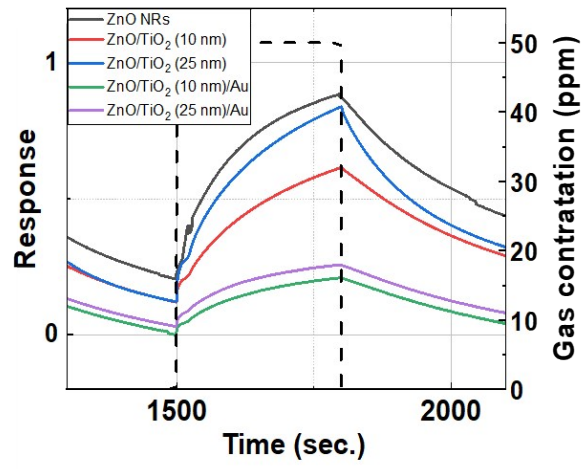

**(b) Annealed**

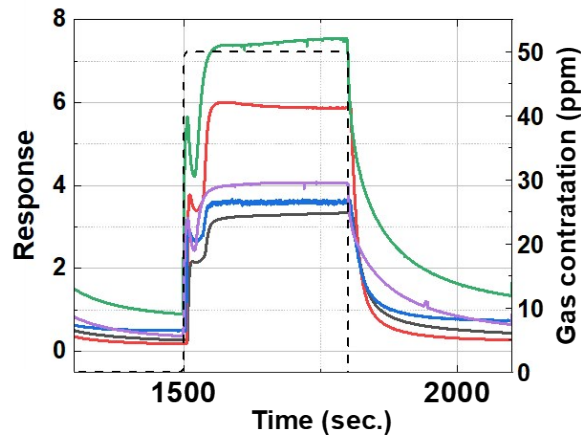

**Fig. S4** Response of gas sensors at 50 ppm of  $\text{NO}_2$  gas concentration with the UV irradiation. (a) As-grown and (b) annealed gas sensors.

| Element                         | As-grown              |                       | Annealed              |                       |
|---------------------------------|-----------------------|-----------------------|-----------------------|-----------------------|
|                                 | T <sub>s</sub> (sec.) | T <sub>r</sub> (sec.) | T <sub>s</sub> (sec.) | T <sub>r</sub> (sec.) |
| ZnO NRs                         | 210                   | 245                   | 48                    | 100                   |
| ZnO/TiO <sub>2</sub> (10 nm)    | 240                   | 252                   | 43                    | 50                    |
| ZnO/TiO <sub>2</sub> (25 nm)    | 226                   | 230                   | 40                    | 74                    |
| ZnO/TiO <sub>2</sub> (10 nm)/Au | 225                   | 258                   | 45                    | 148                   |
| ZnO/TiO <sub>2</sub> (25 nm)/Au | 225                   | 256                   | 42                    | 162                   |

**Table S2.** T<sub>s</sub> and T<sub>r</sub> values of gas sensors at 50 ppm of NO<sub>2</sub> gas concentration with UV irradiation.

Fig. S4 and Table S2. show the response (T<sub>s</sub>) and recovery (T<sub>r</sub>) time of gas sensors. In Fig. S2, we can see the annealed gas sensor graphs are steeper than as-grown gas sensors. This is like the annealed one have a faster response and recovery times than as-grown one due to the enhanced electrical properties of ZnO NRs and high crystallinity of TiO<sub>2</sub> shell layer through the annealing process.<sup>28</sup> Furthermore, in Table S2., the annealed gas sensors with a TiO<sub>2</sub> shell layer deposited on the ZnO NRs have the fastest response and recovery time than others. However, the Au layer deposited to the gas sensors show the slow-down recovery time. It is due to the UV light absorption in Au layer as explained in our manuscript.

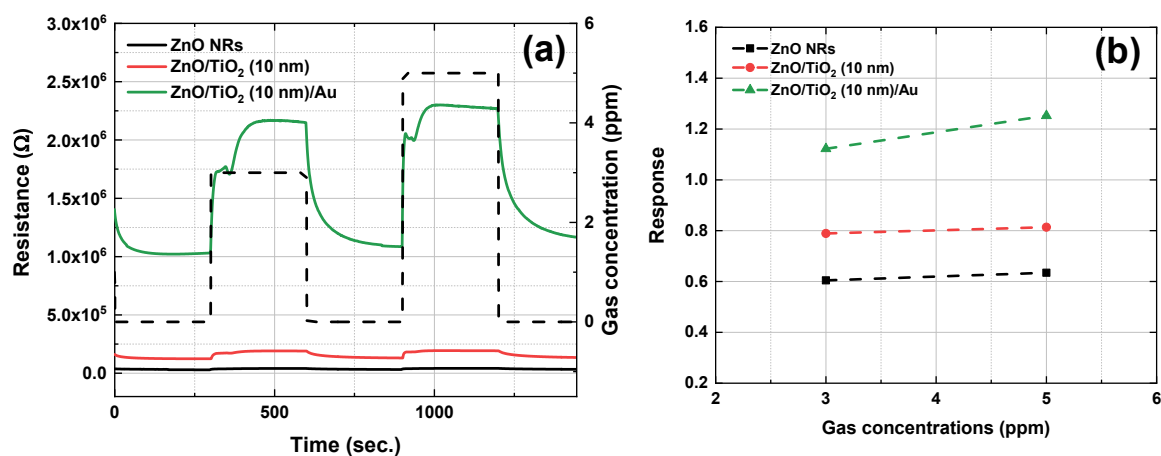

**Fig. S5** (a) Resistance of annealed gas sensors with UV irradiation as a 3 and 5 ppm of NO<sub>2</sub> gas concentrations. (b) Response values of gas sensors as NO<sub>2</sub> gas concentrations of 3 and 5 ppm, respectively.

The gas sensor fabricated with ZnO/TiO<sub>2</sub> (10 nm) core-shell nanorods decorated with Au nanoparticles also show the highest response than the ZnO/TiO<sub>2</sub> (10 nm) core-shell NRs and ZnO NRs at the 3 and 5 ppm of NO<sub>2</sub> gas concentrations.

## References

- [1] Y. Xu, L. Zheng, C. Yang, W. Zheng, X. Liu, and J. Zhang, *Sens. Actuator B-Chem.*, 2020, **310**, 127846.
- [2] F. Kayaci, S. Vempati, C. Ozgit-Akgun, I. Donmez, N. Biyikli, T. Uyar, *Nanoscale*, 2014, **6**, 5735.
- [3] S. Panigrahi, D. Basak, *Nanoscale*, 2011, **3**, 2336.
