# Supplementary figures and images for: Ultraviolet light-emitting diode-assisted highly sensitive room temperature NO2 gas sensors based on low-temperature solution-processed ZnO/TiO2 nanorods decorated with plasmonic Au nanoparticles
Source: Royal Society of Chemistry journal article supplement (doi:10.1039/d1nr01001h), 2021-01-01

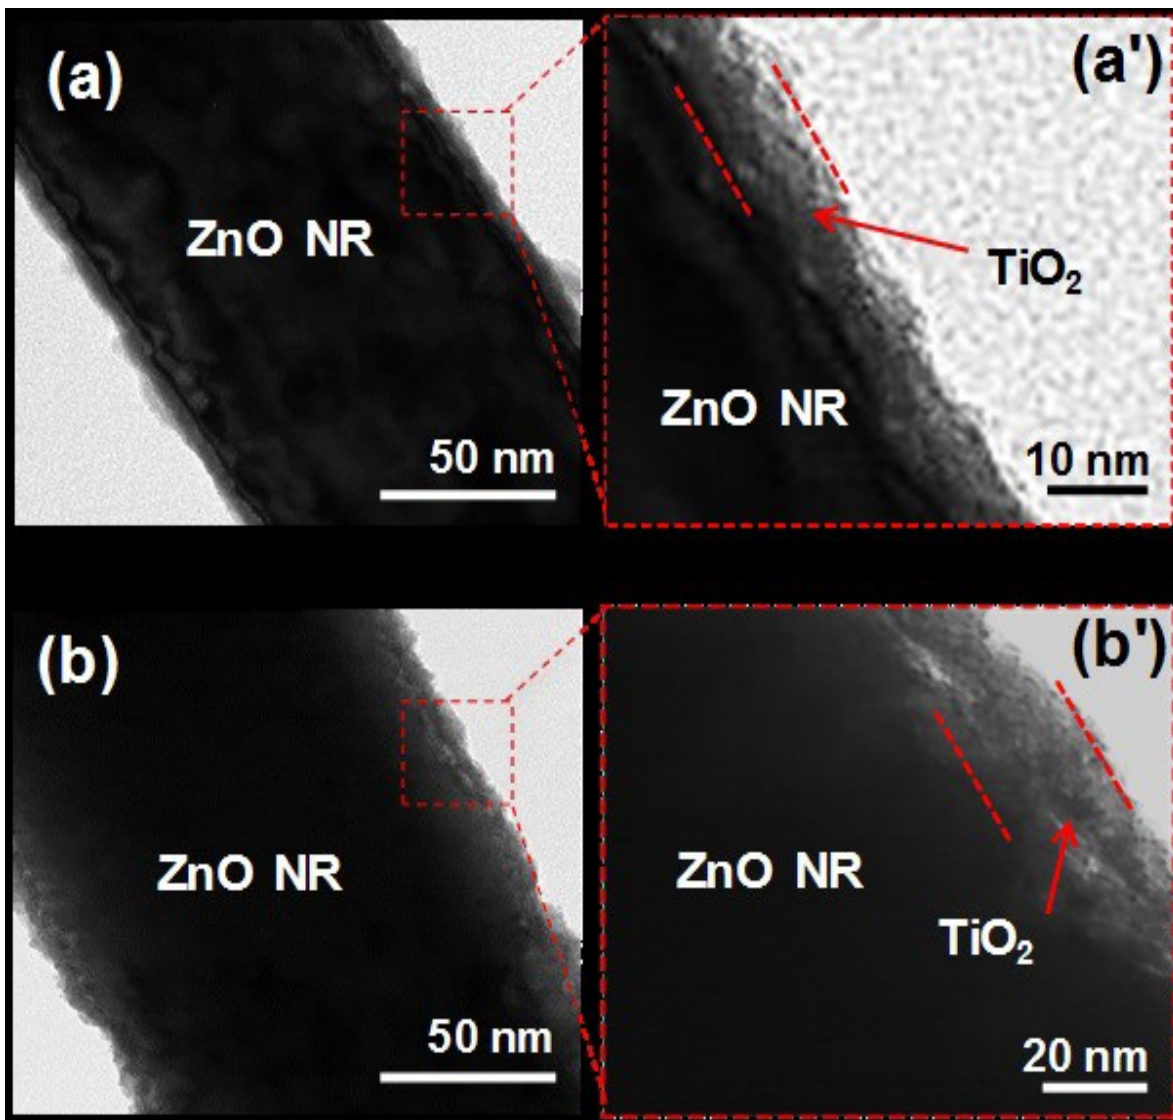

Supplement: d1nr01001h2.pdf [file d1nr01001h2.pdf]

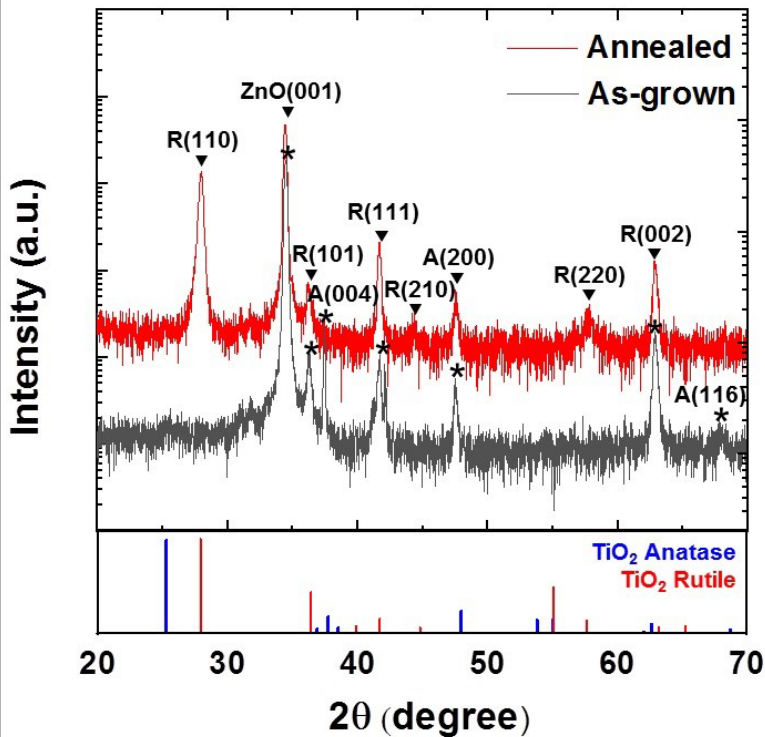

Supplement: d1nr01001h3.pdf [file d1nr01001h3.pdf]

## (a) As-grown

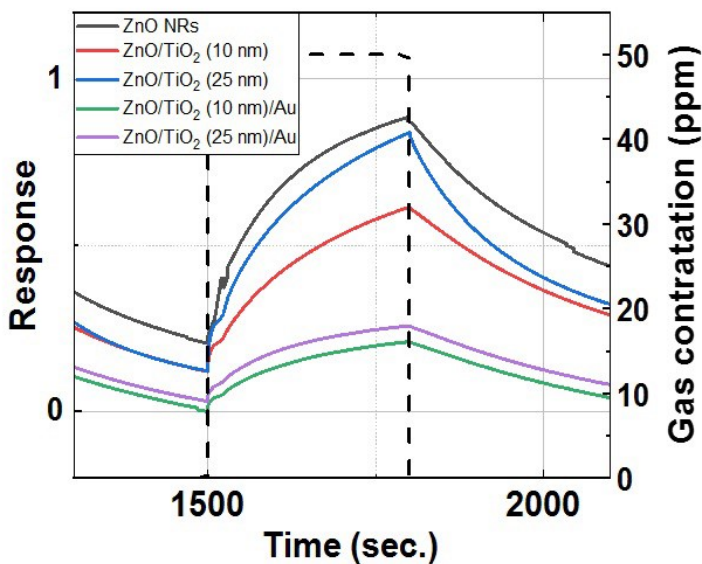

## (b) Annealed

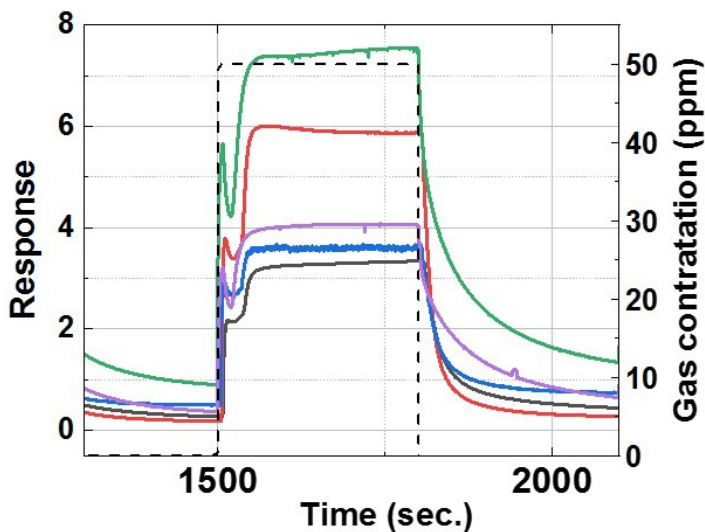

Supplement: d1nr01001h4.pdf [file d1nr01001h4.pdf]

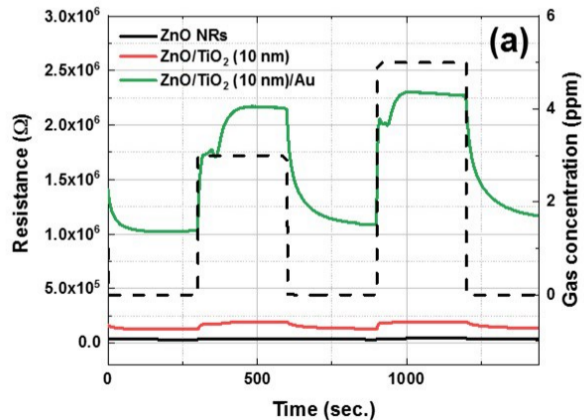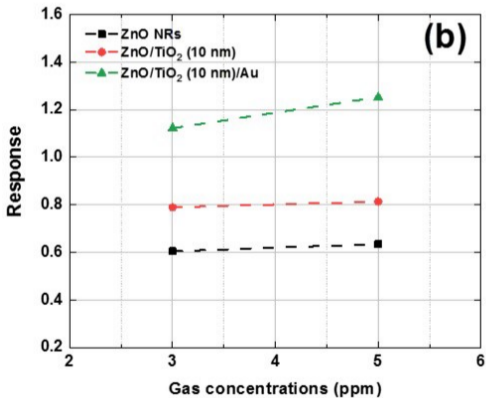

Supplement: d1nr01001h5.pdf [file d1nr01001h5.pdf]

## ZnO/TiO<sub>2</sub> (10 nm)/Au (Annealed)

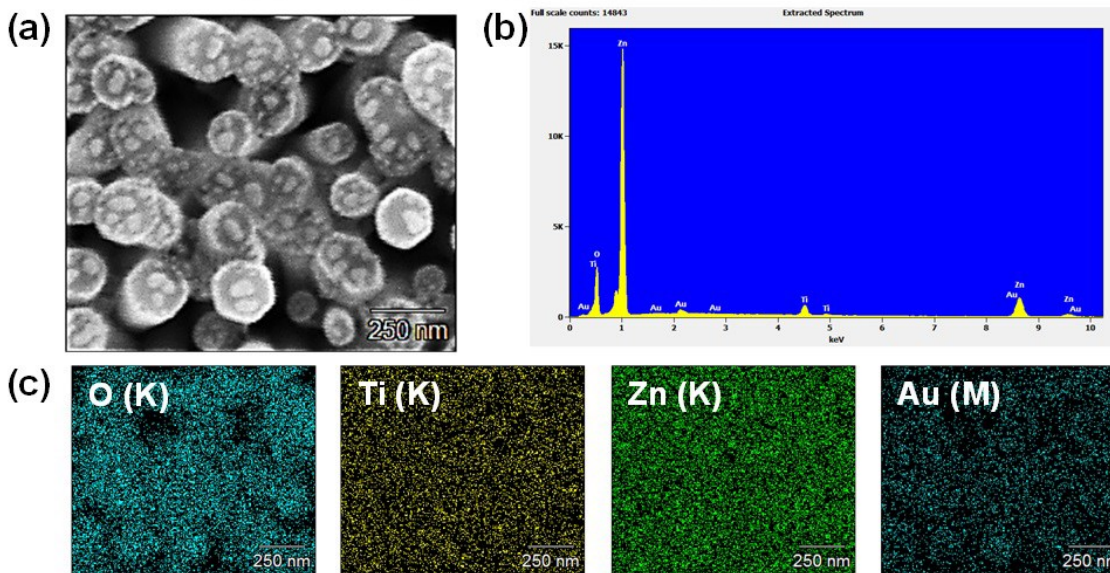

## ZnO/TiO<sub>2</sub> (25 nm)/Au (Annealed)

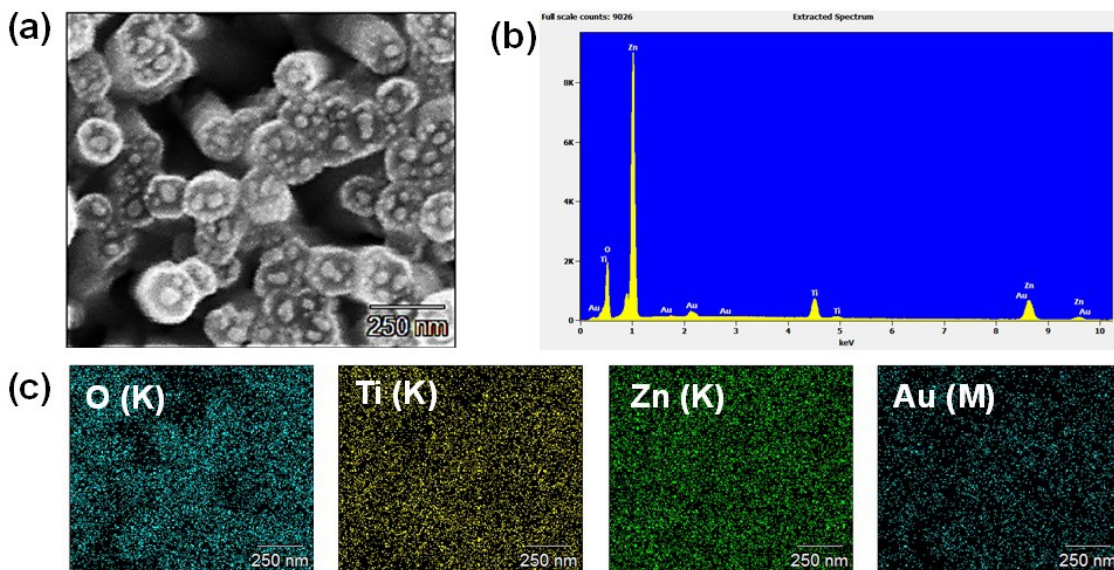

Supplement: d1nr01001h6.pdf [file d1nr01001h6.pdf]
